# Supplementary material for: A study on the catalytic activity of polypeptides toward the hydrolysis of glucoside compounds gastrodin, polydatin and esculin
Source: Royal Society of Chemistry journal article supplement (doi:10.1039/d2tb01758j), 2022-01-01
Supplement: d2tb01758j1.pdf [file d2tb01758j1.pdf]

## Supporting Information

### **Study on catalytic activity of polypeptides toward hydrolysis of glucoside compounds gastrodin, polydatin and esculin**

Juan Hou<sup>a†</sup>, Xiangmin Lei<sup>a†</sup>, Borui Liu<sup>b</sup>, Zejiang Wang<sup>a</sup>, Guozhen Fang<sup>a</sup>, Jifeng Liu<sup>\*a</sup>, Shuo Wang<sup>\*a,c</sup>

<sup>a</sup> State Key Laboratory of Food Nutrition and Safety, Key Laboratory of Food Quality and Healthy of Tianjin, College of Food Science and Engineering, Tianjin University of Science and Technology, Tianjin, 300457, PR China

<sup>b</sup> Research Center of Food Science and Human Health, School of Medicine, Nankai University, Tianjin, 300071, PR China.

\*Email:liujifeng111@gmail.com,wangshuo@nankai.edu.cn,1300086783@qq.com,1462798917@qq.com,  
812964406@qq.com

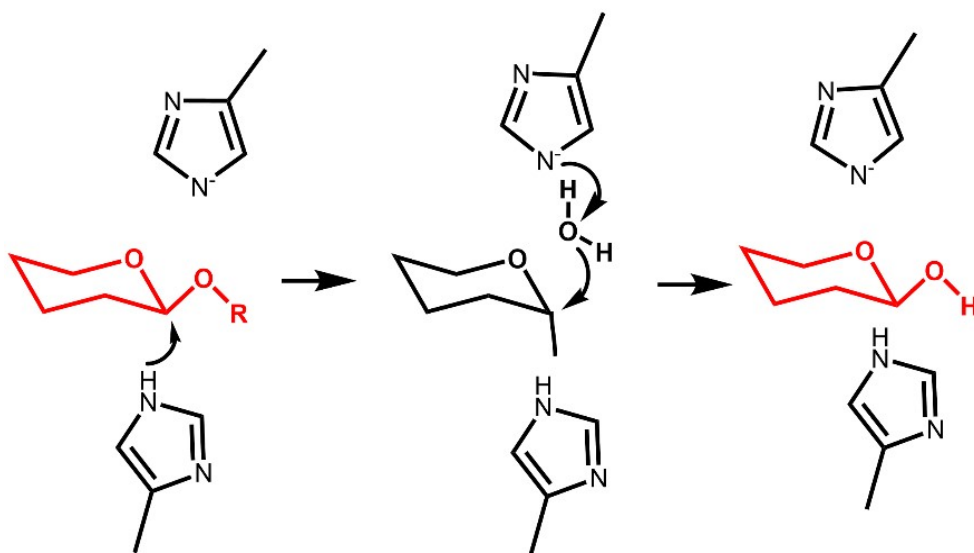

**Scheme.S1.** Schematic representation showing the mechanism of acid-base couple catalysis in the designed glycoside hydrolases with histidine.

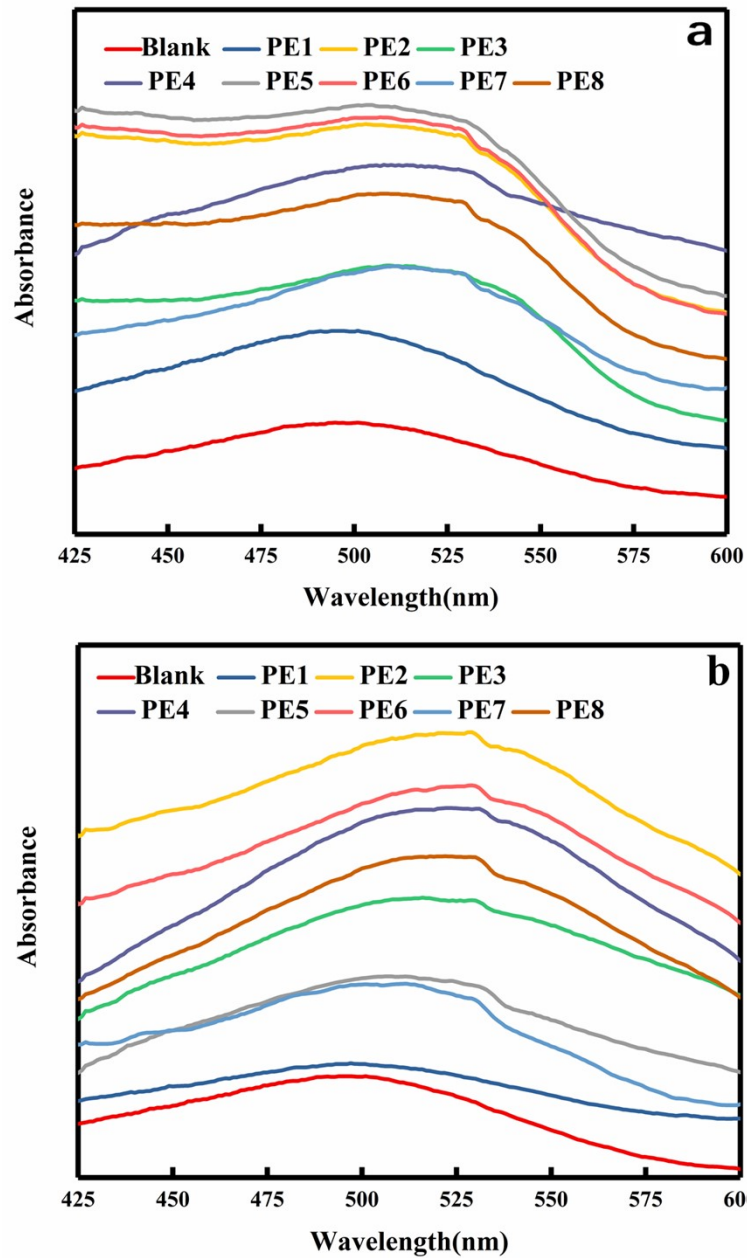

**Fig. S1** UV-vis spectrum of CR in the presence of peptide nanofibrils (20 mM). a: PEs b: PEs-Zn. (20 $\mu$ L self-assembled PEs was added to 380 $\mu$ L Congo red (pH=7.4 25 $\mu$ M) solution. The final PEs was 20 $\mu$ M, and the Congo red was 23.75 $\mu$ M).

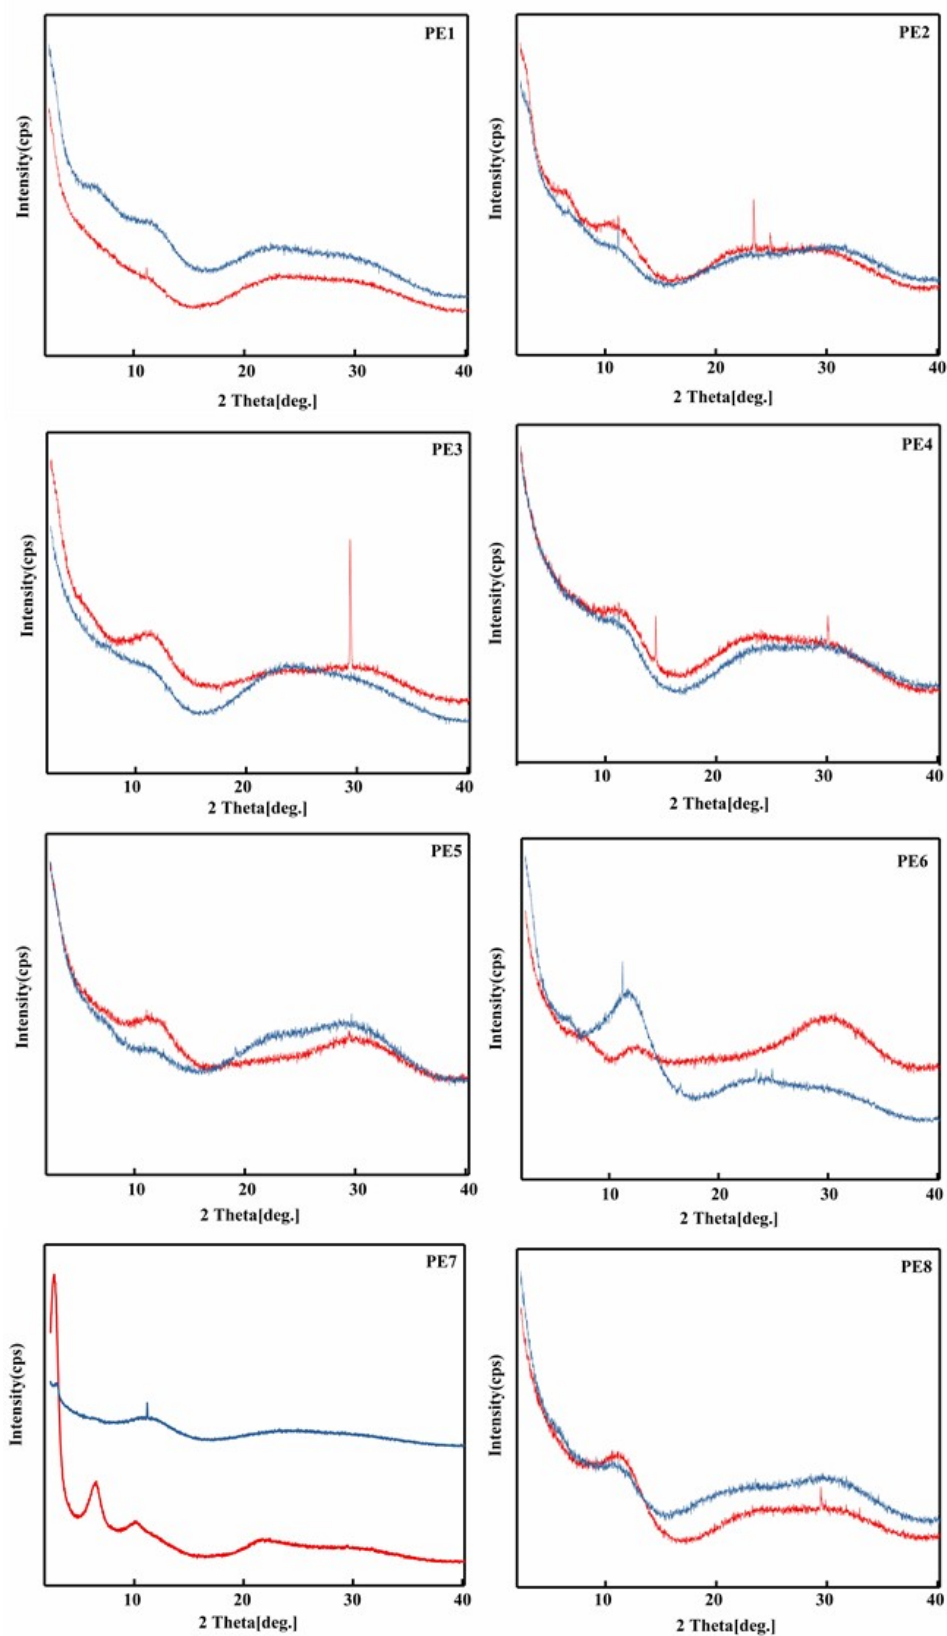

**Fig. S2** X-ray diffractograms of PEs. Blue curve: PEs; red curve: PEs-Zn. All the PEs show a crystal phase with different peaks except for inactive P1, which showed a non-crystalline phase.

**Table S1** Calculated NRMSD and parameters for CD data

| Polypeptide | NRMSD        | Result | Helix1 | Helix2 | Strand1 | Strand2 | Turns | Unordered | Total |
|-------------|--------------|--------|--------|--------|---------|---------|-------|-----------|-------|
| PE1         | <b>0.013</b> | 1.000  | 0.006  | 0.028  | 0.316   | 0.137   | 0.115 | 0.399     | 1.001 |
| PE1-Zn      | <b>0.004</b> | 1.000  | 0.210  | 0.113  | 0.320   | 0.150   | 0.019 | 0.188     | 1.000 |
| PE2         | <b>0.005</b> | 1.000  | 0.430  | 0.100  | 0.110   | 0.080   | 0.100 | 0.170     | 0.990 |
| PE2-Zn      | <b>0.001</b> | 1.000  | 0.520  | 0.120  | 0.130   | 0.095   | 0.087 | 0.049     | 1.001 |
| PE3         | 0.051        | 1.000  | 0.031  | 0.045  | 0.266   | 0.131   | 0.114 | 0.413     | 1.000 |
| PE3-Zn      | <b>0.011</b> | 1.000  | 0.185  | 0.173  | 0.210   | 0.112   | 0.115 | 0.205     | 1.000 |
| PE4         | <b>0.023</b> | 1.000  | 0.110  | 0.210  | 0.230   | 0.150   | 0.110 | 0.180     | 1.000 |
| PE4-Zn      | <b>0.012</b> | 1.000  | 0.121  | 0.267  | 0.234   | 0.155   | 0.127 | 0.096     | 1.000 |
| PE5         | <b>0.019</b> | 1.000  | 0.040  | 0.080  | 0.240   | 0.130   | 0.270 | 0.250     | 1.010 |
| PE5-Zn      | <b>0.002</b> | 1.000  | 0.111  | 0.167  | 0.341   | 0.175   | 0.210 | 0.007     | 1.001 |
| PE6         | 0.078        | 1.000  | 0.120  | 0.160  | 0.350   | 0.150   | 0.010 | 0.200     | 0.990 |
| PE6-Zn      | <b>0.016</b> | 1.000  | 0.232  | 0.176  | 0.218   | 0.220   | 0.009 | 0.145     | 1.000 |
| PE7         | <b>0.001</b> | 1.000  | 0.250  | 0.030  | 0.18    | 0.140   | 0.150 | 0.260     | 1.010 |
| PE7-Zn      | <b>0.001</b> | 1.000  | 0.361  | 0.115  | 0.218   | 0.163   | 0.112 | 0.111     | 1.000 |
| PE8         | <b>0.017</b> | 1.000  | 0.330  | 0.020  | 0.170   | 0.160   | 0.110 | 0.210     | 1.000 |
| PE8-Zn      | <b>0.002</b> | 1.000  | 0.390  | 0.109  | 0.156   | 0.212   | 0.135 | 0.109     | 1.000 |
